# Supplementary material for: Microfluidic formation of pH responsive 5CB droplets decorated with PAA-b-LCP
Source: Royal Society of Chemistry journal article supplement (doi:10.1039/c1lc20402e), 2011-01-01
Supplement: c1lc20402e.pdf [file c1lc20402e.pdf]

## Supporting Information for

### Formation of pH Responsive 5CB Droplets decorated with PAA-*b*-LCP using Microfluidics

Waliullah Khan,<sup>a</sup> Jin Ho Choi,<sup>b</sup> Gyu Man Kim,<sup>b</sup> and Soo-Young Park<sup>\*,a</sup>

<sup>†</sup> Department of Polymer Science, Kyungpook National University, #1370 Sangyuk-dong,  
Buk-gu, Daegu 702-701, South Korea

<sup>‡</sup> School of Mechanical Engineering, Kyungpook National University, #1370 Sangyuk-dong,  
Buk-gu, Daegu 702-701, South Korea

\* To whom correspondence should be addressed,

Tel +82-53-950-5630; Fax +82-53-950-6623; e-mail [psy@knu.ac.kr](mailto:psy@knu.ac.kr)

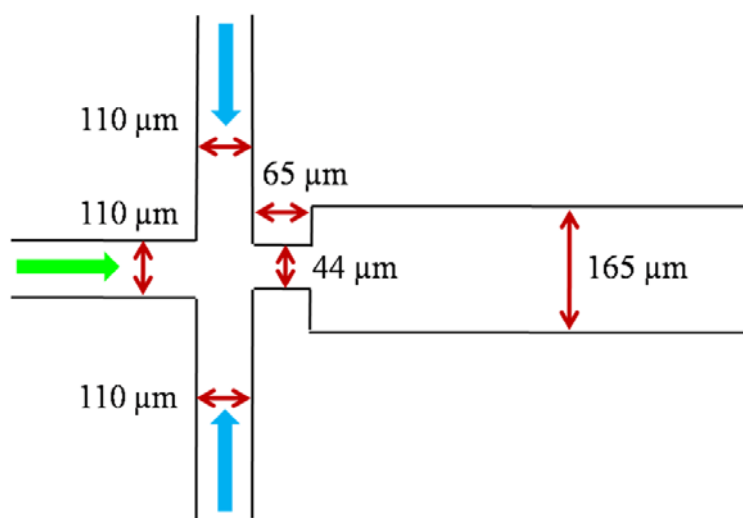

(a)

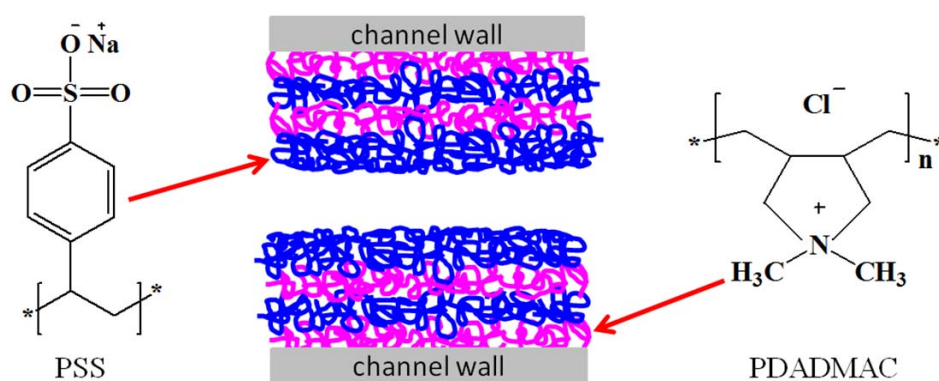

(b)

**Figure SI 1.** (a) The microchip used for the droplets generation and (b) the schematic illustration of the surface modification of the PDMS microchannel with the multi layers of PDDMAC (purple) and PSS (blue) complex with chemical structures of PDDMAC (cationic polyelectrolyte) and PSS (anionic polyelectrolyte).

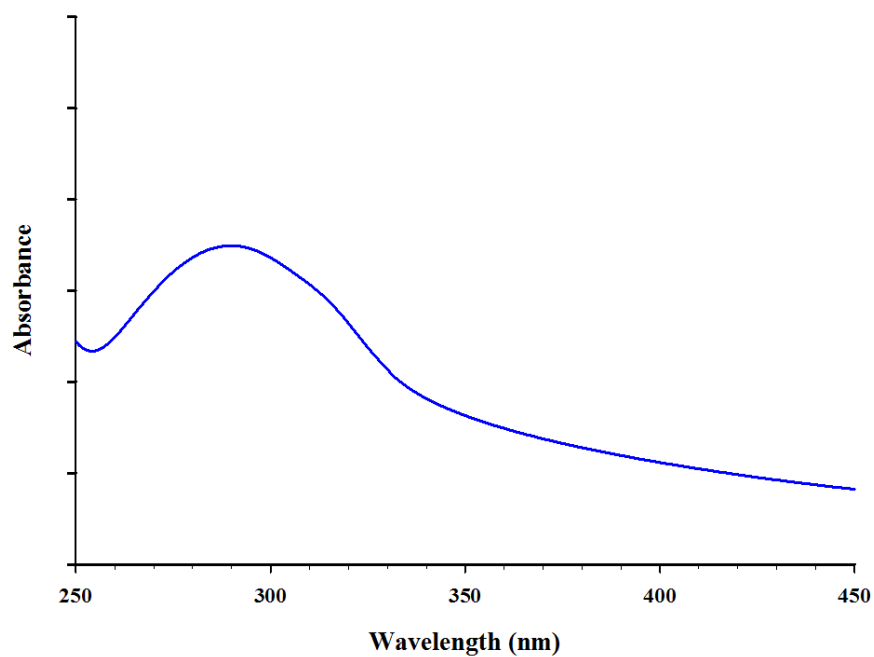

**Figure SI 2.** UV-absorbance spectra for 5CB droplets coated with L-PAA-b-LCP.

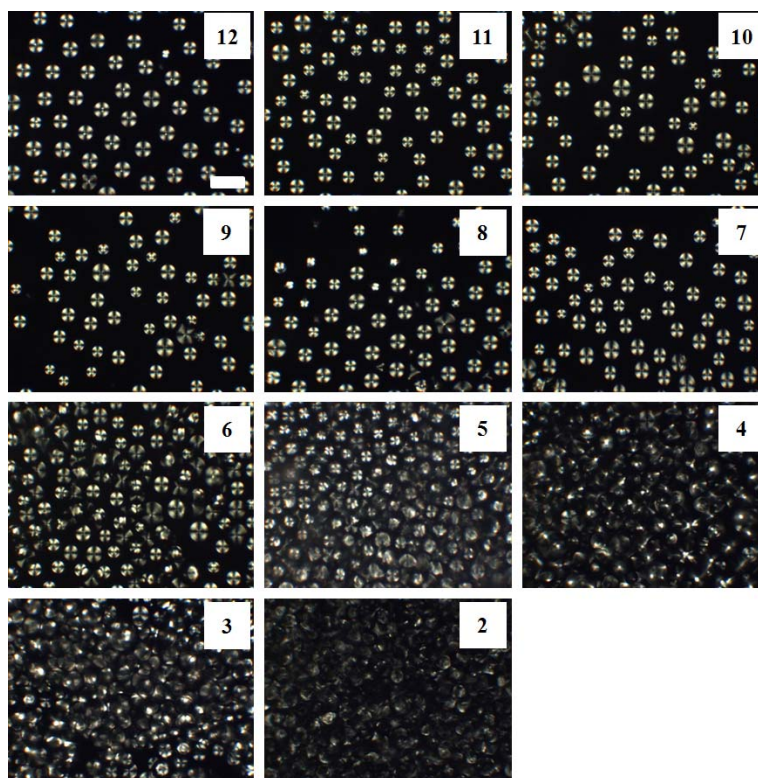

**Figure SI 3.** Polarized optical micrographs of the 5CB droplets coated with a 0.025 wt % PAA-*b*-LCP solution observed under a polarized optical microscope with a cross polar state at different pHs; the number in the figure indicate the respective pH; the scale bar represent 100  $\mu\text{m}$ .

**Movies SI 4(a-d):** Formation of stable LC microdroplets which pass through the entire length of microchannel without any coalescence; Microdroplets generation at flow rates of 0.2 (b), 0.15 (c), and 0.1 mLh<sup>-1</sup> (d), the flow rate for dispersed phase is 0.01 mLh<sup>-1</sup> for all the samples (corresponding to Fig. 1).
